# Supplementary material for: High-mobility flexible pentacene-based organic field-effect transistors with PMMA/PVP double gate insulator layers and the investigation on their mechanical flexibility and thermal stability
Source: Royal Society of Chemistry journal article supplement (doi:10.1039/c5ra18996a), 2015-01-01
Supplement: c5ra18996a1.pdf [file c5ra18996a1.pdf]

## Supplementary Information

### Figure caption of the Supplementary Information

#### Figure S1

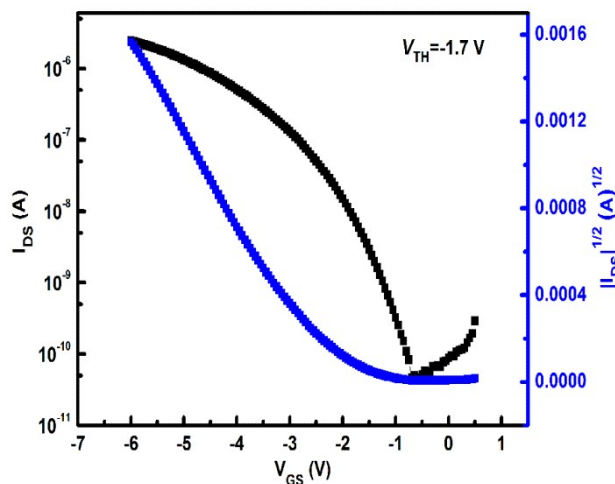

Figure S1

Figure S1: the transfer curves of the flexible OFETs with thinner double PMMA/PVP gate insulators ( $\sim 60$  nm)

#### Figure S2

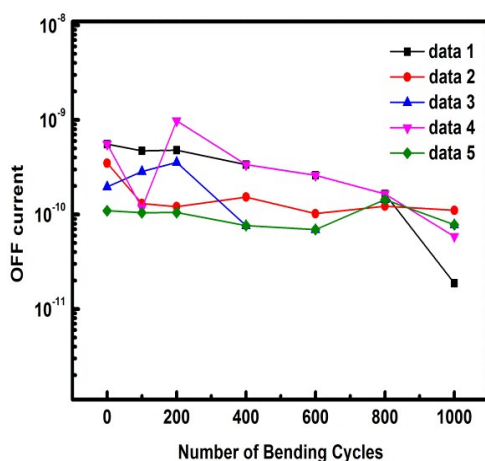

Figure S2 (a)

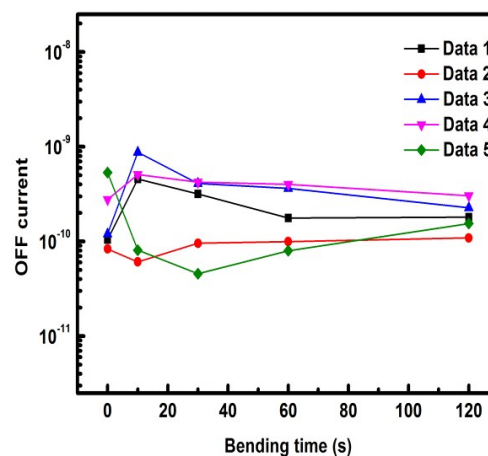

Figure S2 (b)

Figure S2: The variation in OFF current of the flexible OTFTs as a function of (a) the mechanical bending cycles and (b) mechanical bending time.

Figure S3

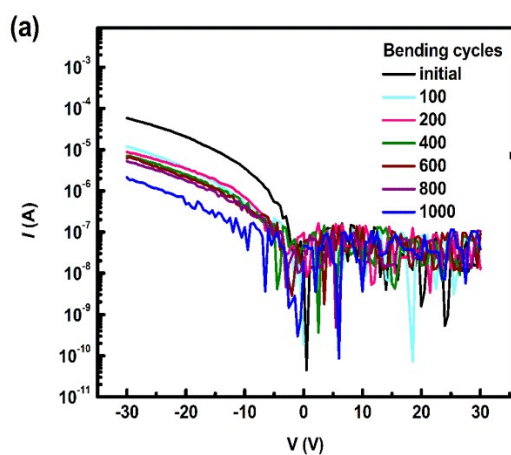

Figure S3 (a)

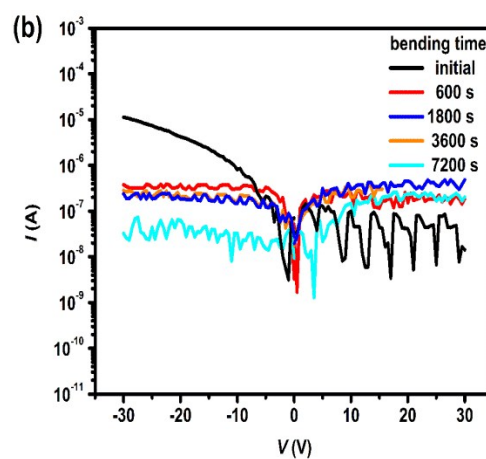

Figure S3 (b)

Figure S3: The Variation of the electrical properties of the diodes with structure of Au (Source)/pentacene/Au (Drain) of flexible OFETs as function of (a) the mechanical bending cycles and (b) mechanical bending time
